# Supplementary material for: Teaching the Biological Consequences of Alcohol Abuse through an Online Game: Impacts among Secondary Students
Source: Atypon-hosted journal article supplement (doi:10.1187/cbe.11-04-0040), 2012-03-01
Supplement: combinedsupmats.pdf [file combinedsupmats.pdf]

**Appendix:** Attitude items and multiple-choice content questions in the *N-Squad* field test (correct answers to content questions underlined).

|                                                                                                                                                                                                                                                                                                                                                                                                                                                                                                            |
|------------------------------------------------------------------------------------------------------------------------------------------------------------------------------------------------------------------------------------------------------------------------------------------------------------------------------------------------------------------------------------------------------------------------------------------------------------------------------------------------------------|
| <b>Satisfaction*#</b>                                                                                                                                                                                                                                                                                                                                                                                                                                                                                      |
| <ul style="list-style-type: none"> <li>• The web-adventures were interesting</li> <li>• I would recommend the web-adventures to my friends</li> <li>• I liked playing the web-adventures</li> <li>• I would play web-adventures like this at home</li> <li>• I think the web-adventures were boring (reverse coded)</li> <li>• I'd like to learn more science using web-adventures like this</li> </ul>                                                                                                    |
| <b>Game usability*#</b>                                                                                                                                                                                                                                                                                                                                                                                                                                                                                    |
| <ul style="list-style-type: none"> <li>• Sometimes I got stuck in the game because I didn't know what to do next (reverse coded)</li> <li>• The science vocabulary made it difficult to follow the story (reverse coded)</li> <li>• The explanations/instructions given in the game were confusing (reverse coded)</li> </ul>                                                                                                                                                                              |
| <b>Attitudes toward science*</b>                                                                                                                                                                                                                                                                                                                                                                                                                                                                           |
| <ul style="list-style-type: none"> <li>• Scientists are boring people (reverse coded)</li> <li>• In school, I enjoy my science class</li> <li>• Science is important</li> <li>• Science is too difficult to be any fun (reverse coded)</li> <li>• I would like to be a scientist</li> </ul>                                                                                                                                                                                                                |
| <b>Content questions</b>                                                                                                                                                                                                                                                                                                                                                                                                                                                                                   |
| <p>1. One serving of beer (12 oz.) has:</p> <ol style="list-style-type: none"> <li>a) less alcohol than one serving of wine (5 oz.)</li> <li>b) less alcohol than one serving of liquor (1.5 oz.)</li> <li>c) <u>the same amount of alcohol as one serving of wine (5 oz.) or liquor (1.5 oz.)</u></li> <li>d) more alcohol than one serving of wine (5 oz.) or liquor (1.5 oz.)</li> </ol>                                                                                                                |
| <p>2. What is an effective way to sober up after drinking alcohol?</p> <ol style="list-style-type: none"> <li>a) Drink coffee</li> <li>b) Take a cold shower</li> <li>c) <u>Allow for time to pass</u></li> <li>d) Switching to another type of alcohol</li> </ol>                                                                                                                                                                                                                                         |
| <p>3. Which statement below about teens is false?</p> <ol style="list-style-type: none"> <li>a) Teens are twice as likely to be in alcohol related crashes than adults.</li> <li>b) Teens tend not to be as experienced with driving than adults.</li> <li>c) Teens' judgment skills are more harmed by alcohol even if they drink less than adults.</li> <li>d) <u>Teens' driving skills are less likely to be affected by alcohol since teens generally have better eyesight than adults.</u></li> </ol> |
| <p>4. Which statement below about alcoholism is true?</p> <ol style="list-style-type: none"> <li>a) It is an untreatable disease.</li> <li>b) It can be cured.</li> <li>c) <u>It can be treated.</u></li> <li>d) It is not an addiction.</li> </ol>                                                                                                                                                                                                                                                        |
| <p>5. Which of the following is an effect caused by a depressant?</p> <ol style="list-style-type: none"> <li>a) <u>Slowed thinking ability</u></li> <li>b) Increased feeling of energy</li> <li>c) Quicker reaction time</li> <li>d) Constant sadness</li> </ol>                                                                                                                                                                                                                                           |
| <p>6. Which organ filters out toxins from the blood and is also the largest organ in the body?</p> <ol style="list-style-type: none"> <li>a) Stomach</li> <li>b) Large intestine</li> <li>c) Pancreas</li> <li>d) <u>Liver</u></li> </ol>                                                                                                                                                                                                                                                                  |

|                                                                                                                                                                                                                                                                                                                                                           |
|-----------------------------------------------------------------------------------------------------------------------------------------------------------------------------------------------------------------------------------------------------------------------------------------------------------------------------------------------------------|
| <p>7. Which of the following is the correct pathway in which alcohol moves through the digestive system?</p> <p>a) Mouth to esophagus to large intestine to small intestine<br/> b) Mouth to stomach to liver to small intestine<br/> c) <u>Mouth to esophagus to stomach to small intestine</u><br/> d) Mouth to stomach to large intestine to liver</p> |
| <p>8. Short-term alcohol abuse and obesity are major causes of:</p> <p>a) <u>a fatty liver</u><br/> e) cirrhosis<br/> f) hepatitis<br/> g) bleeding from the intestines</p>                                                                                                                                                                               |
| <p>9. Causes of cirrhosis are:</p> <p>a) <u>hepatitis from long-term alcohol abuse</u><br/> b) hepatitis from short-term alcohol abuse<br/> c) obesity and eating too many calories<br/> d) rapid weight loss and malnutrition</p>                                                                                                                        |
| <p>10. Which organ filters alcohol out of the bloodstream?</p> <p>a) Pancreas<br/> b) <u>Liver</u><br/> c) Small intestine<br/> d) Stomach</p>                                                                                                                                                                                                            |
| <p>11. Alcohol can be classified as the following type of drug:</p> <p>a) <u>Depressant</u><br/> b) Hallucinogen<br/> c) Anti-emetic<br/> d) Stimulant</p>                                                                                                                                                                                                |
| <p>12. Which organ eliminates feces (poop) and absorbs water and minerals into the bloodstream?</p> <p>a) Small intestine<br/> b) Liver<br/> c) <u>Large intestine</u><br/> d) Pancreas</p>                                                                                                                                                               |
| <p>13. Which organ absorbs about 80% of the alcohol into the bloodstream?</p> <p>a) Liver<br/> b) Large intestine<br/> c) <u>Small intestine</u><br/> d) Stomach</p>                                                                                                                                                                                      |
| <p>14. Which organ absorbs about 20% of the alcohol into the bloodstream?</p> <p>a) Liver<br/> b) Small intestine<br/> c) <u>Stomach</u><br/> d) Pancreas</p>                                                                                                                                                                                             |
| <p>15. Liver scarring is another name for which condition?</p> <p>a) Fatty liver<br/> b) Hepatitis<br/> c) <u>Cirrhosis</u><br/> d) Normal liver</p>                                                                                                                                                                                                      |
| <p>16. What type of alcohol is found in beer and other alcoholic beverages?</p> <p>a) Methanol<br/> b) <u>Ethanol</u><br/> c) Propanol<br/> d) Butanol</p>                                                                                                                                                                                                |

|                                                                                                                                                                                                                                          |
|------------------------------------------------------------------------------------------------------------------------------------------------------------------------------------------------------------------------------------------|
| <p>17. Which three fluids are normally used to screen a dead body for alcohol?</p> <p>a) Blood, saliva, and tears<br/> b) Urine, sweat, and mucous<br/> c) Phlegm, sweat, and saliva<br/> d) <u>Vitreous humor, blood, and urine</u></p> |
| <p>18. During which stage does alcohol move INTO the bloodstream?</p> <p>a) Elimination<br/> b) <u>Absorption</u><br/> c) Distribution<br/> d) Metabolism</p>                                                                            |
| <p>19. Alcohol moves out of the bloodstream into the water-containing organs of the body as part of the process of:</p> <p>a) elimination<br/> b) absorption<br/> c) <u>distribution</u><br/> d) metabolism</p>                          |
| <p>20. The body gets rid of alcohol through:</p> <p>a) peristalsis and meiosis<br/> b) absorption and neurotransmission<br/> c) <u>metabolism and excretion</u><br/> d) glycolysis and mitosis</p>                                       |
| <p>21. What does BAC stand for?</p> <p>a) Body Alcohol Cavity<br/> b) Blood Activity Craving<br/> c) Basic Activity Circulation<br/> d) <u>Blood Alcohol Concentration</u></p>                                                           |
| <p>22. In which stage does BAC increase?</p> <p>a) <u>Absorption</u><br/> b) Elimination<br/> c) Distribution<br/> d) Mitosis</p>                                                                                                        |
| <p>23. In which stages does BAC decrease?</p> <p>b) Mitosis and Elimination<br/> c) Absorption and Distribution<br/> d) <u>Elimination and Distribution</u><br/> e) Absorption and Mitosis</p>                                           |
| <p>24. Alcohol is broken down by enzymes in the:</p> <p>a) kidney<br/> b) lungs<br/> c) <u>liver</u><br/> d) heart</p>                                                                                                                   |
| <p>25. The higher the BAC, the:</p> <p>a) longer it takes for the body to get rid of the alcohol.<br/> b) more intoxicated a person is.<br/> c) less coordinated the body is.<br/> d) <u>all of the above.</u></p>                       |
| <p>26. Which of the following is NOT an important factor in determining BAC?</p> <p>a) Whether the person is male or female<br/> b) <u>Height</u><br/> c) Weight<br/> d) The number of drinks consumed per hour</p>                      |

|                                                                                                                                                                                                                                                                                |
|--------------------------------------------------------------------------------------------------------------------------------------------------------------------------------------------------------------------------------------------------------------------------------|
| <p>27. On average, how many servings of alcohol can the body metabolize per hour?</p> <p>a) <u>One</u></p> <p>b) Two</p> <p>c) Three</p> <p>d) Four</p>                                                                                                                        |
| <p>28. One reason why women are more affected by alcohol than men is because females have less:</p> <p>a) insulin</p> <p>b) <u>ADH</u></p> <p>c) fat</p> <p>d) minerals</p>                                                                                                    |
| <p>29. The process by which alcohol is broken down by enzymes is called:</p> <p>a) excretion</p> <p>b) absorption</p> <p>c) <u>metabolism</u></p> <p>d) distribution</p>                                                                                                       |
| <p>30. Intoxication can occur if:</p> <p>a) <u>alcohol molecules outnumber ADH molecules.</u></p> <p>b) ADH molecules outnumber alcohol molecules.</p> <p>c) alcohol molecules and ADH molecules are equal in number.</p> <p>d) DNA molecules outnumber alcohol molecules.</p> |
| <p>31. An adult with a BAC of 5% (0.05) will be:</p> <p>a) over the legal limit to drive.</p> <p>b) unimpaired by the alcohol.</p> <p>c) in danger of alcohol poisoning.</p> <p>d) <u>having slowed reactions.</u></p>                                                         |
| <p>32. A gene is a segment of:</p> <p>a) alcohol dehydrogenase</p> <p>b) endorphin</p> <p>c) <u>deoxyribonucleic acid</u></p> <p>d) endocannabinoid</p>                                                                                                                        |
| <p>33. The likelihood that a person will use alcohol is influenced by his/her peers, family, community and:</p> <p>a) metabolism</p> <p>b) mitochondria</p> <p>c) <u>genes</u></p> <p>d) cognitive ability</p>                                                                 |
| <p>34. Which of the following structures transmits AND receives messages?</p> <p>a) <u>Neuron</u></p> <p>b) Ribosome</p> <p>c) Axon</p> <p>d) Dendrite</p>                                                                                                                     |
| <p>35. The gap between neurons is called the:</p> <p>a) receptor</p> <p>b) <u>synapse</u></p> <p>c) myelin</p> <p>d) neurotransmitter</p>                                                                                                                                      |
| <p>36. A zero-tolerance law is an example of which type of influence on drinking?</p> <p>a) Peer</p> <p>b) Family</p> <p>c) <u>Community</u></p> <p>d) Gene</p>                                                                                                                |

|                                                                                                                                                                                                                                                              |
|--------------------------------------------------------------------------------------------------------------------------------------------------------------------------------------------------------------------------------------------------------------|
| <p>37. Which of the following chemicals carries messages across the synapse?</p> <p>a) DNA<br/> b) <u>Neurotransmitter</u><br/> c) Myelin<br/> d) Alcohol dehydrogenase</p>                                                                                  |
| <p>38. Messages move across the synapse from:</p> <p>a) axon to axon<br/> b) dendrite to axon<br/> c) <u>axon to dendrite</u><br/> d) dendrite to dendrite</p>                                                                                               |
| <p>39. An area of the brain involved in impulse control, thinking and planning is the:</p> <p>a) cerebellum<br/> b) <u>prefrontal cortex</u><br/> c) brain stem<br/> d) nucleus accumbens</p>                                                                |
| <p>40. Which brain area is important for learning and forming new memories?</p> <p>a) Spinal cord<br/> b) Brain stem<br/> c) <u>Hippocampus</u><br/> d) Corpus callosum</p>                                                                                  |
| <p>41. The brain's ability to change by "wiring" itself in response to a person's thoughts or actions is called:</p> <p>a) elasticity<br/> b) <u>plasticity</u><br/> c) toxicity<br/> d) viscosity</p>                                                       |
| <p>42. Two brain areas that undergo extensive wiring during adolescence are:</p> <p>a) spinal cord and hippocampus<br/> b) brain stem and prefrontal cortex<br/> c) <u>hippocampus and prefrontal cortex</u><br/> d) cerebellum and spinal cord</p>          |
| <p>43. Alcohol damages learning and memory:</p> <p>a) <u>more in teens than in adults</u><br/> b) more in adults than in teens<br/> c) in teens and adults to the same degree<br/> d) only in teens</p>                                                      |
| <p>44. Prior to binding to a receptor, a neurotransmitter:</p> <p>a) is broken down by enzymes in the synapse<br/> b) <u>crosses the synapse between neurons</u><br/> c) is absorbed into the receiving neuron<br/> d) is stored in the receiving neuron</p> |
| <p>45. Which of the following is a symptom of alcoholism caused by neuroadaptation?</p> <p>a) Increased alertness<br/> b) <u>Withdrawal</u><br/> c) Rapid eye movement<br/> d) Pain</p>                                                                      |
| <p>46. Alcohol dependence is treated using special medications and:</p> <p>a) surgery<br/> b) <u>behavioral therapy</u><br/> c) vaccines<br/> d) radiation therapy</p>                                                                                       |

\* Answer options: (1) Strongly disagree, (2) Disagree, (3) Neutral, (4) Agree, (5) Strongly Agree

# Post-test only
